# Supplementary material
Source: MDPI journal article supplement (https://www.mdpi.com/2297-8739/10/12/599)
Supplement: s1 [file s1 › separations-2710464-supplementary.pdf]

# Green and Fast Extraction of Chitin from Waste Shrimp Shells: Characterization and Application in the Removal of Congo Red Dye

Fatma Zohra Gharbi <sup>1,2</sup>, Nabil Bougdah <sup>2,3</sup>, Youghourta Belhocine <sup>1,4</sup>, Najoua Sbei <sup>5</sup>, Seyfeddine Rahali <sup>6</sup>, Maamar Damous <sup>1,7</sup> and Mahamadou Seydou <sup>8,\*</sup>

<sup>1</sup> Department of Process Engineering, Faculty of Technology, University of 20 August 1955, Skikda 21000, Algeria; fz.gharbi@univ-skikda.dz (F.Z.G.); y.belhocine@univ-skikda.dz (Y.B.); m.damous@univ-skikda.dz (M.D.)

<sup>2</sup> Laboratory LRPCI, University of 20 August 1955, Skikda 21000, Algeria; n.bougdah@univ-skikda.dz

<sup>3</sup> Department of Petrochemical, Faculty of Technology, University of 20 August 1955, Skikda 21000, Algeria

<sup>4</sup> Laboratory of Catalysis, Bioprocess and Environment, Department of Process Engineering, Faculty of Technology, University of 20 August 1955, Skikda 21000, Algeria

<sup>5</sup> Institute of Nanotechnology, Karlsruhe Institute of Technology, 76344 Karlsruhe, Germany; najwasbei89@hotmail.fr

<sup>6</sup> Department of Chemistry, College of Science and Arts, Qassim University, Buraydah 51452, Saudi Arabia; saif.rahali@gmail.com

<sup>7</sup> Research Unit of Environmental Chemistry and Molecular Structural (CHEMS), University of Constantine 1, Constantine 25000, Algeria

<sup>8</sup> Université Paris Cité, CNRS, ITODYS, F-75013 Paris, France

\* Correspondence: mahamadou.seydou@univ-paris-diderot.fr

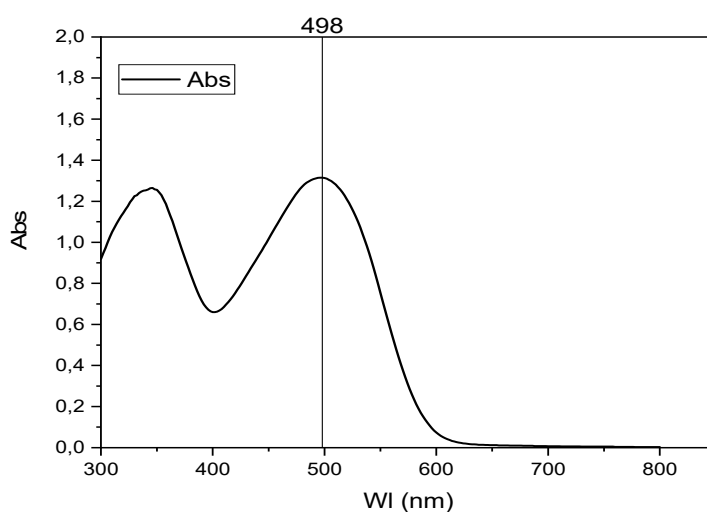

**Figure S1.** Determination of  $\lambda_{\max}$  of Congo Red dye solution using UV-visible spectrophotometer

Figure S2 illustrate the calibration curve obtained by measuring the absorbance of each solution and utilizing a standard solution with a known concentration of the dye

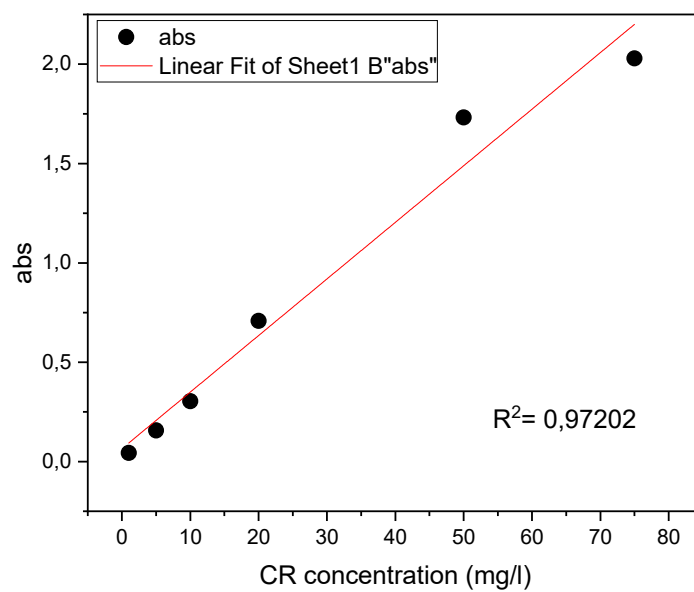

**Figure S2.** Calibration curve for different concentration of standard Congo Red dye solution.
